# Supplementary material
Source: Springer Nature journal article supplement (https://www.springermedizin.de/resource/supplementary/12991_2011_1314_MOESM1_ESM.pdf/9613762)
Supplement: MOESM1 [file 9613762]

Schizophrenic patients, male

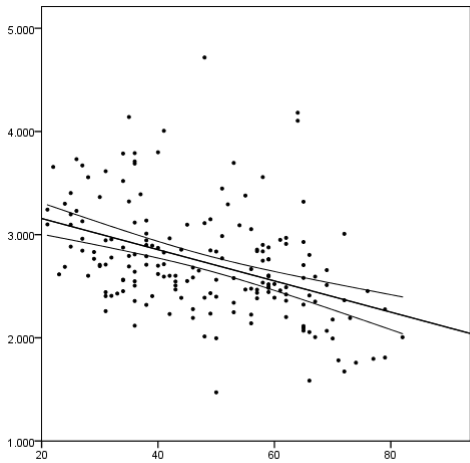

General population, male

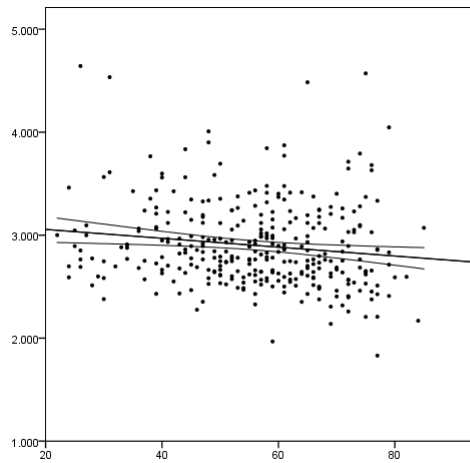

OSI

Schizophrenic patients, female

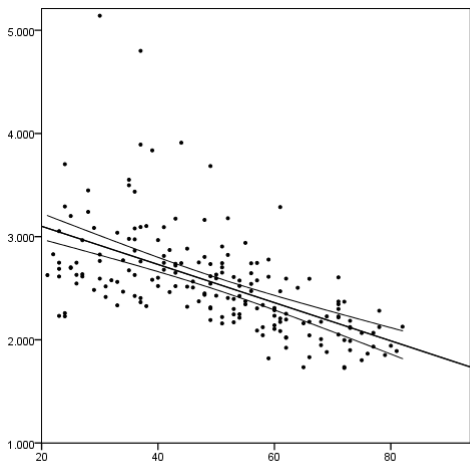

General population, female

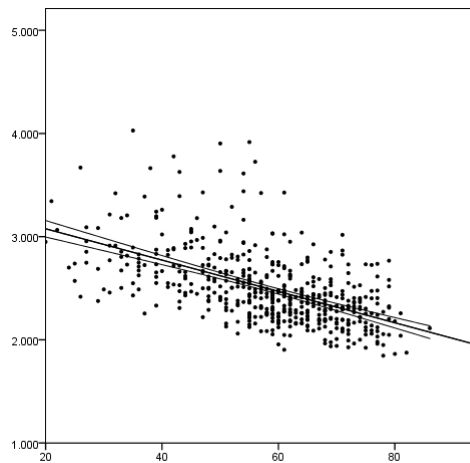

Age
